# Supplementary material
Source: HighWire-hosted journal article supplement (https://ejhp.bmj.com/highwire/filestream/153175/field_highwire_adjunct_files/0/ejhpharm-2022-003554supp001_data_supplement.pdf)
Supplement: ejhpharm-2022-003554supp001_data_supplement.pdf [file ejhpharm-2022-003554supp001_data_supplement.pdf]

## Annex

## Details of questionnaire sent to SPOCs

|                                                                                                                                                                                                                                                                                                                                                                                                                                                                                                                                                                                                                                                                                                                                                                                                                                                                                                                                                                                                                                        |
|----------------------------------------------------------------------------------------------------------------------------------------------------------------------------------------------------------------------------------------------------------------------------------------------------------------------------------------------------------------------------------------------------------------------------------------------------------------------------------------------------------------------------------------------------------------------------------------------------------------------------------------------------------------------------------------------------------------------------------------------------------------------------------------------------------------------------------------------------------------------------------------------------------------------------------------------------------------------------------------------------------------------------------------|
| <ul style="list-style-type: none"> <li>Has your agency made direct changes to its publication practices on shortages and availability issues since the publication in July 2019 of the Good practice guidance for communication to the public on medicines' availability issues (<a href="https://www.ema.europa.eu/en/documents/regulatory-procedural-guideline/good-practice-guidance-communication-public-medicines-availability-issues_en.pdf">https://www.ema.europa.eu/en/documents/regulatory-procedural-guideline/good-practice-guidance-communication-public-medicines-availability-issues_en.pdf</a>)             <ul style="list-style-type: none"> <li><i>Yes (please provide details below)</i></li> <li><i>No, not yet, but we are planning to implement the following changes (please specify below)</i></li> <li><i>No, we are already aligned with the good practice guidance</i></li> <li><i>No, we are not aware of any plans to change current practice (please add any comments below)</i></li> </ul> </li> </ul> |
| <ul style="list-style-type: none"> <li>Does your agency have a dedicated area on its public website providing information on shortages of individual medicines (e.g. a catalogue)?             <ul style="list-style-type: none"> <li><i>Y/N</i></li> </ul> </li> </ul>                                                                                                                                                                                                                                                                                                                                                                                                                                                                                                                                                                                                                                                                                                                                                                |
| <ul style="list-style-type: none"> <li>Which elements does your agency publish for shortages of individual medicines? <i>(Select all that apply)</i> <ul style="list-style-type: none"> <li><i>Trade name</i></li> <li><i>Active ingredient (INN)</i></li> <li><i>Pharmaceutical form</i></li> <li><i>Strength</i></li> <li><i>Marketing authorisation holder</i></li> <li><i>Cause of shortage</i></li> <li><i>Start date of shortage</i></li> <li><i>Estimated end date of shortage</i></li> <li><i>Availability of alternative medicines (without specifying details of the alternative medicines, e.g: name, strength, pharmaceutical form)</i></li> <li><i>Alternative medicines available (including details of the alternative medicines, e.g: name, strength, pharmaceutical form)</i></li> <li><i>Others</i></li> </ul> </li> </ul>                                                                                                                                                                                           |

**Supplemental table 1:** Details of authorities that publish a catalogue of shortages

| EU/EEA authority                                               | Type of information in 2020 | Type of information in 2018 |
|----------------------------------------------------------------|-----------------------------|-----------------------------|
| Austria                                                        | Catalogue                   | Catalogue                   |
| Belgium                                                        | Catalogue                   | Catalogue                   |
| Bulgaria                                                       | Catalogue                   | Catalogue                   |
| Croatia                                                        | Catalogue                   | Catalogue                   |
| Cyprus                                                         | No catalogue available      | No catalogue available      |
| Czechia                                                        | Catalogue                   | Catalogue                   |
| Denmark                                                        | Catalogue                   | Catalogue                   |
| Estonia                                                        | Catalogue                   | Catalogue                   |
| Finland                                                        | Catalogue                   | Catalogue                   |
| France                                                         | Catalogue                   | Catalogue                   |
| Germany (Paul Ehrlich Institut)                                | Catalogue                   | Catalogue                   |
| Germany (Bundesinstitut fuer Arzneimittel und Medizinprodukte) | Catalogue                   | Catalogue                   |
| Greece                                                         | Catalogue                   | Catalogue                   |
| Hungary                                                        | Catalogue                   | Catalogue                   |
| Ireland                                                        | Catalogue                   | No catalogue available      |
| Iceland                                                        | Catalogue                   | Catalogue                   |
| Italy                                                          | Catalogue                   | Catalogue                   |
| Latvia                                                         | Catalogue                   | Catalogue                   |
| Liechtenstein                                                  | No catalogue available      | No catalogue available      |
| Luxembourg                                                     | No catalogue available      | No catalogue available      |
| Lithuania                                                      | Catalogue                   | Catalogue                   |

| EU/EEA authority | Type of information in 2020 | Type of information in 2018 |
|------------------|-----------------------------|-----------------------------|
| Malta            | No catalogue available      | No catalogue available      |
| Netherlands      | No catalogue available      | No catalogue available      |
| Norway           | Catalogue                   | Catalogue                   |
| Poland           | No catalogue available      | No catalogue available      |
| Portugal         | Catalogue                   | No catalogue available      |
| Romania          | Catalogue                   | Catalogue                   |
| Slovak Rep.      | Catalogue                   | Catalogue                   |
| Slovenia         | Catalogue                   | Catalogue                   |
| Spain            | Catalogue                   | Catalogue                   |
| Sweden           | Catalogue                   | Catalogue                   |

Supplemental table 2: Details of information provided in the public shortage catalogue

| EU Authority    | Trade | Active | Pharmaceutical form | Strength | Marketing authorisation holder | Cause | Start Date | Estimated end date | Alternatives without details | Alternatives with details | Other |
|-----------------|-------|--------|---------------------|----------|--------------------------------|-------|------------|--------------------|------------------------------|---------------------------|-------|
| Austria         | ✓     | ✓      | ✓                   | ✓        | ✓                              | ✓     | ✓          | ✓                  | ✗                            | ✗                         | ✓     |
| Belgium         | ✓     | ✓      | ✓                   | ✓        | ✓                              | ✓     | ✓          | ✓                  | ✗                            | ✓                         | ✗     |
| Bulgaria        | ✓     | ✓      | ✓                   | ✓        | ✓                              | ✗     | ✓          | ✗                  | ✗                            | ✗                         | ✓     |
| Croatia         | ✓     | ✓      | ✓                   | ✓        | ✓                              | ✓     | ✓          | ✓                  | ✗                            | ✗                         | ✗     |
| Czech Rep.      | ✓     | ✓      | ✓                   | ✓        | ✗                              | ✓     | ✓          | ✓                  | ✗                            | ✗                         | ✗     |
| Denmark         | ✓     | ✓      | ✓                   | ✓        | ✓                              | ✓     | ✓          | ✓                  | ✗                            | ✗                         | ✓     |
| Estonia         | ✓     | ✓      | ✓                   | ✓        | ✓                              | ✗     | ✗          | ✓                  | ✓                            | ✗                         | ✗     |
| Finland         | ✓     | ✓      | ✓                   | ✓        | ✓                              | ✗     | ✓          | ✓                  | ✗                            | ✗                         | ✓     |
| France          | ✓     | ✓      | ✓                   | ✓        | ✓                              | ✗     | ✓          | ✗                  | ✓                            | ✗                         | ✗     |
| Germany (PEI)   | ✓     | ✓      | ✓                   | ✓        | ✓                              | ✗     | ✓          | ✓                  | ✗                            | ✓                         | ✗     |
| Germany (BfArM) | ✓     | ✓      | ✓                   | ✓        | ✓                              | ✓     | ✓          | ✓                  | ✓                            | ✓                         | ✗     |
| Greece          | ✓     | ✓      | ✓                   | ✓        | ✓                              | ✗     | ✓          | ✓                  | ✓                            | ✗                         | ✗     |
| Hungary         | ✓     | ✓      | ✓                   | ✓        | ✓                              | ✓     | ✓          | ✓                  | ✓                            | ✗                         | ✓     |
| Ireland         | ✓     | ✓      | ✓                   | ✓        | ✗                              | ✓     | ✓          | ✓                  | ✗                            | ✗                         | ✓     |
| Iceland         | ✓     | ✗      | ✓                   | ✓        | ✗                              | ✓     | ✓          | ✓                  | ✓                            | ✗                         | ✗     |
| Italy           | ✓     | ✓      | ✓                   | ✓        | ✓                              | ✗     | ✓          | ✓                  | ✓                            | ✗                         | ✗     |
| Latvia          | ✓     | ✓      | ✓                   | ✓        | ✓                              | ✗     | ✓          | ✓                  | ✗                            | ✓                         | ✗     |
| Lithuania       | ✓     | ✓      | ✓                   | ✓        | ✓                              | ✓     | ✓          | ✓                  | ✗                            | ✓                         | ✓     |
| Norway          | ✓     | ✓      | ✓                   | ✓        | ✓                              | ✓     | ✓          | ✓                  | ✓                            | ✗                         | ✗     |
| Portugal        | ✓     | ✓      | ✓                   | ✓        | ✓                              | ✓     | ✓          | ✓                  | ✓                            | ✗                         | ✗     |
| Romania         | ✓     | ✓      | ✓                   | ✓        | ✓                              | ✓     | ✓          | ✓                  | ✓                            | ✗                         | ✗     |
| Slovak Rep.     | ✓     | ✗      | ✓                   | ✓        | ✓                              | ✗     | ✓          | ✗                  | ✓                            | ✗                         | ✓     |
| Slovenia        | ✓     | ✗      | ✓                   | ✓        | ✓                              | ✗     | ✓          | ✓                  | ✓                            | ✗                         | ✗     |
| Spain           | ✓     | ✓      | ✓                   | ✓        | ✓                              | ✗     | ✓          | ✓                  | ✓                            | ✗                         | ✗     |

| EU Authority | Trade | Active | Pharmaceutical form | Strength | Marketing authorisation holder | Cause | Start Date | Estimated end date | Alternatives without details | Alternatives with details | Other |
|--------------|-------|--------|---------------------|----------|--------------------------------|-------|------------|--------------------|------------------------------|---------------------------|-------|
| Sweden       | ✓     | ✓      | ✓                   | ✓        | ✓                              | ✗     | ✓          | ✓                  | ✗                            | ✓                         | ✗     |

**Supplemental table 3:** Selection criteria for publishing in the shortage catalogue

| EU Authority    | Criteria for publication |
|-----------------|--------------------------|
| Austria         | X                        |
| Belgium         | ✓                        |
| Bulgaria        | No information provided  |
| Croatia         | X                        |
| Czech Rep.      | X                        |
| Denmark         | ✓                        |
| Estonia         | X                        |
| Finland         | X                        |
| France          | ✓                        |
| Germany (PEI)   | X                        |
| Germany (BfArM) | ✓                        |
| Greece          | ✓                        |
| Hungary         | X                        |
| Ireland         | ✓                        |
| Iceland         | No information provided  |
| Italy           | X                        |
| Latvia          | X                        |
| Lithuania       | X                        |
| Norway          | ✓                        |
| Portugal        | ✓                        |
| Romania         | X                        |
| Slovak Rep.     | X                        |
| Slovenia        | X                        |

| EU Authority | Criteria for publication |
|--------------|--------------------------|
| Spain        | ✓                        |
| Sweden       | ✗                        |

**Supplemental table 4:** Type of changes made by competent authorities to their publication practices on shortages and availability issues since publication of the communication practices

| Country  | Change                                                                                                                                                                            |
|----------|-----------------------------------------------------------------------------------------------------------------------------------------------------------------------------------|
| Austria  | Catalogue updated with information on medicines with a parallel export ban.                                                                                                       |
| Belgium  | Publication for all availability issues, publication 2 weeks before expected start date of shortage, information on availabilities and set-up of taskforce for critical medicines |
| Denmark  | Introduction of catalogue for “serious” and “critical” shortages including information about expected duration (start/end dates) and cause of shortage.                           |
| Iceland  | Total overview of reported shortages (updated weekly)<br>Dedicated news guidance to HCP/patients<br>Shortage reporting from MAHs and consumers/HCPs                               |
| Italy    | Updated information on webpage (actions taken during COVID-19)                                                                                                                    |
| Latvia   | Information is uploaded 2 hours after notification<br>Improved communication on medicines in foreign packaging material<br>Information on stocks                                  |
| Portugal | Implementation of catalogue                                                                                                                                                       |

**Supplemental table 5:** Details of future changes planned by competent authorities

| Country         | Plans for implementation                                                                                                                                                                                                 |
|-----------------|--------------------------------------------------------------------------------------------------------------------------------------------------------------------------------------------------------------------------|
| Croatia         | Change from pdf to machine readable format                                                                                                                                                                               |
| Czech Republic  | English version of the catalogue in addition to the national language version (implemented at the time of report writing)<br><br>Possibility to view reports made by marketing authorisation holders updated daily       |
| Cyprus          | No catalogue yet but plans to communicate on critical shortages                                                                                                                                                          |
| France          | Improvements to catalogue (reduce criteria for publication, make information more public friendly)                                                                                                                       |
| Lithuania       | Improvements to catalogue (e.g. interlinking information on revocation/cessation, use of high-profile communication tools, colour-coded information, keeping records on solved situations)                               |
| Luxembourg      | Implementation of catalogue (within the framework of the future National Medicines and Health Products Agency (the Luxembourg Agency for Medicines and Health Products - ALMPS))                                         |
| The Netherlands | Implementation of catalogue                                                                                                                                                                                              |
| Romania         | Information about alternative medicines<br><br>Dedicated section of communication in relation to medicines' availability issues<br><br>Inclusion of key recommendations for shortages and for other availability issues. |
| Slovenia        | Proposed changes are at conceptional level and concrete actions are not defined yet.                                                                                                                                     |
